# Supplementary material
Source: Springer Nature journal article supplement (https://www.springermedizin.de/resource/supplementary/12885_2008_1340_MOESM2_ESM.pdf/9473020)

# IHC c-erbB-2

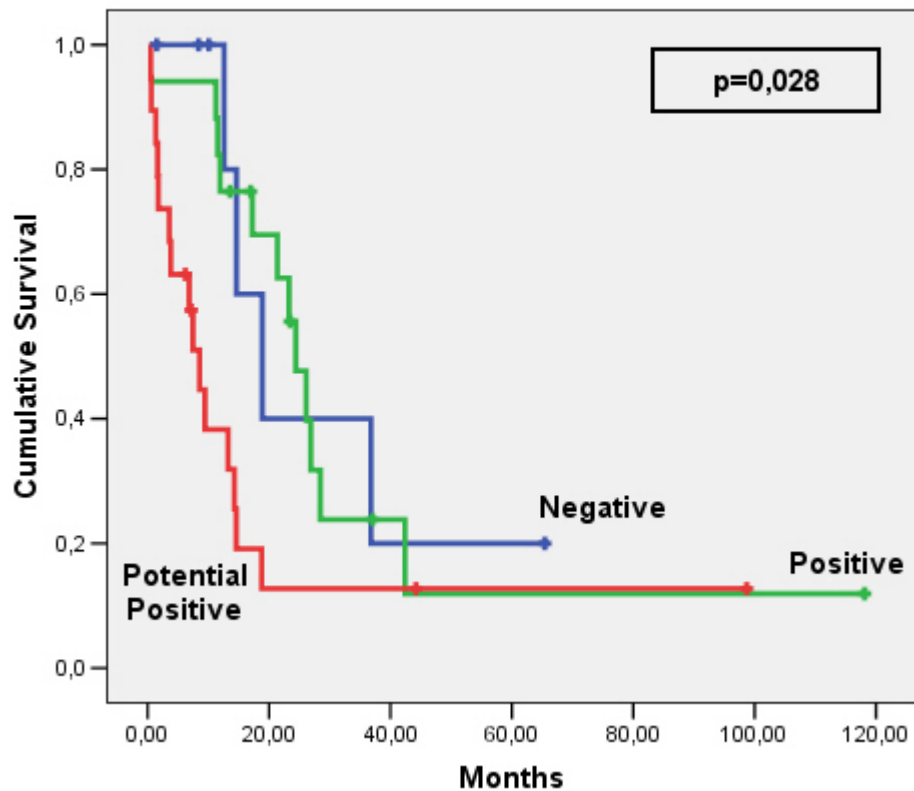

Supplement: MOESM2 [file 9473020]
